# Supplementary material for: Inactivation of Carbonyl-Detoxifying Enzymes by H2O2 Is a Trigger to Increase Carbonyl Load for Initiating Programmed Cell Death in Plants
Source: MDPI journal article supplement (doi:10.3390/antiox9020141), 2020-02-06
Supplement: s1 [file s1]

## A: Control

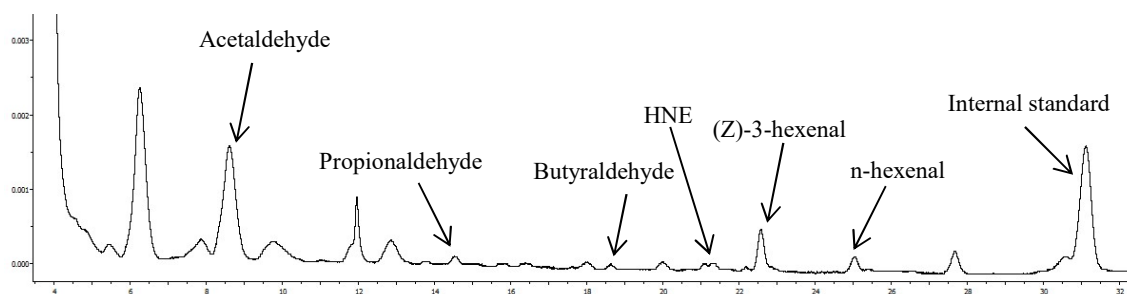

## B: H<sub>2</sub>O<sub>2</sub>-treated

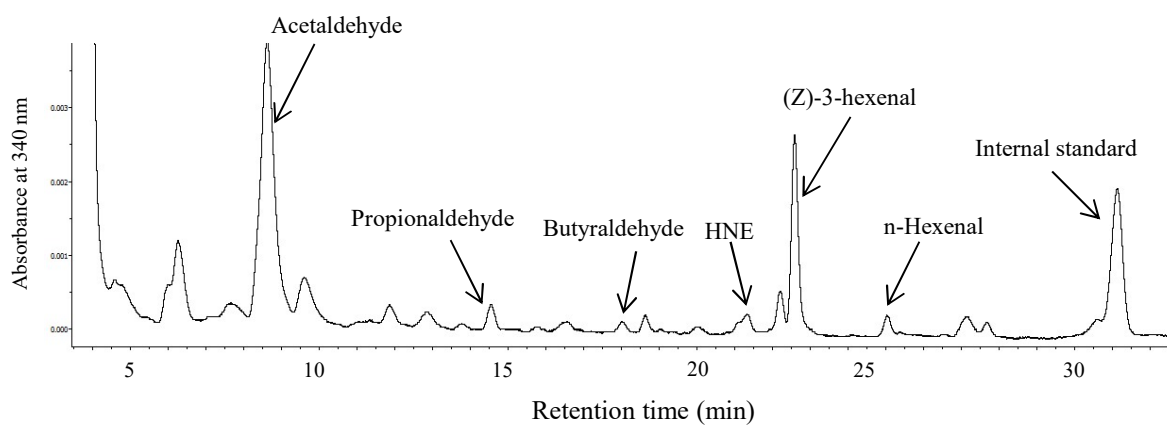

Figure S2. Typical chromatograms of DNP-carbonyls in BY-2 cells. The cells were treated with water as control (A) and H<sub>2</sub>O<sub>2</sub> (B). Four-d-cultured cells treated with H<sub>2</sub>O<sub>2</sub> at 1 mM and incubation for 10 min. The identified aldehydes are labelled at the top of each peak.
