# Supplementary material for: Inactivation of Carbonyl-Detoxifying Enzymes by H2O2 Is a Trigger to Increase Carbonyl Load for Initiating Programmed Cell Death in Plants
Source: MDPI journal article supplement (doi:10.3390/antiox9020141), 2020-02-06
Supplement: s1 [file s1]

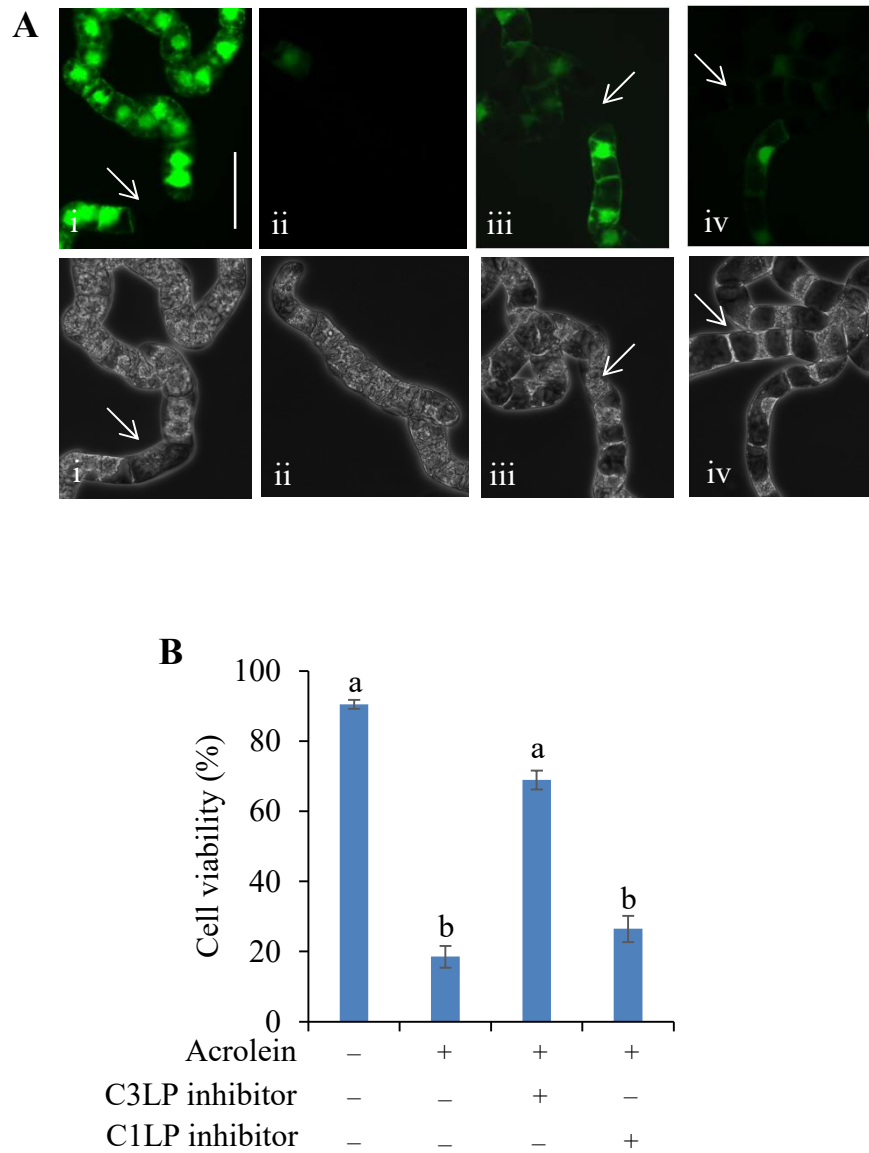

Figure S1. Acrolein-induced cell death was suppressed by the C3LP inhibitor. Four-d cultured BY-2 cells were treated with 0.2 mM acrolein or 0.2 mM acrolein + 20  $\mu$ M of each inhibitor (C1LP or C3LP) and harvested after 5 h. (A) Typical fluorescence photographs (top row) and phase contrast microscopy of the same images (bottom): (i) untreated cells as control, (ii) 0.2 mM acrolein, (iii) 0.2 mM acrolein + 20  $\mu$ M C3LP inhibitor, (iv) 0.2 mM acrolein + 20  $\mu$ M C1LP inhibitor (top). White arrows indicate dead cells. (B) FDA-staining cells were counted for living cells and expressed as percentage. Mean of 3 runs  $\pm$  SEM. Differences among treatments were analyzed by Tukey test.  $P < 0.05$ .
