# Supplementary material for: Inactivation of Carbonyl-Detoxifying Enzymes by H2O2 Is a Trigger to Increase Carbonyl Load for Initiating Programmed Cell Death in Plants
Source: Antioxidants (Basel). 2020 Feb 6;9(2):141. doi: 10.3390/antiox9020141 (PMC7070697; doi:10.3390/antiox9020141)
Supplement: Supplementary file 1 [file antioxidants-09-00141-s001.zip]

Archive with 6 entries (6 files):
- Figure_S1.pdf
- __MACOSX/._Figure_S1.pdf
- Figure_S2.pdf
- __MACOSX/._Figure_S2.pdf
- Figure_S3.pdf
- __MACOSX/._Figure_S3.pdf
